# Supplementary material
Source: PubMed Central journal article supplement (PMC4562673)
Supplement: NIHMS308932-supplement-03.pdf [file NIHMS308932-supplement-03.pdf]

Supp Fig 1:

A

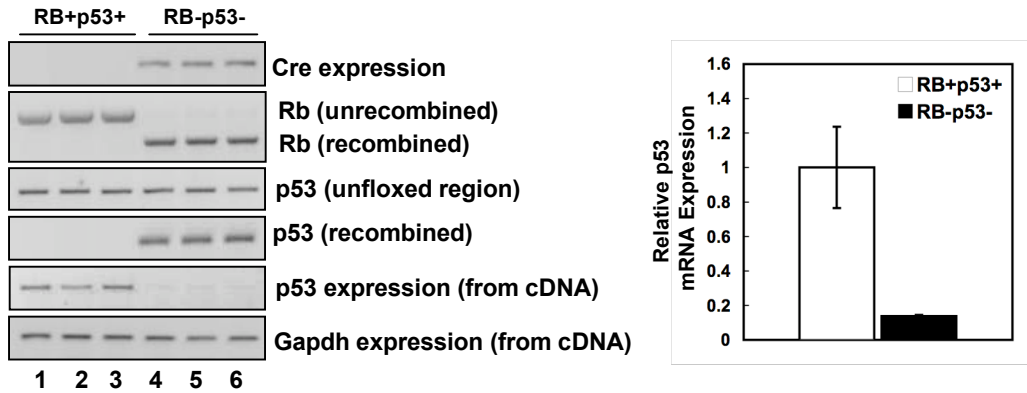

B

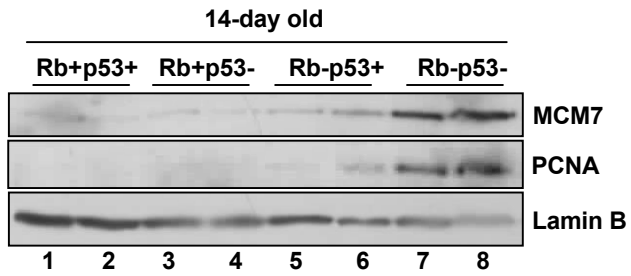

C

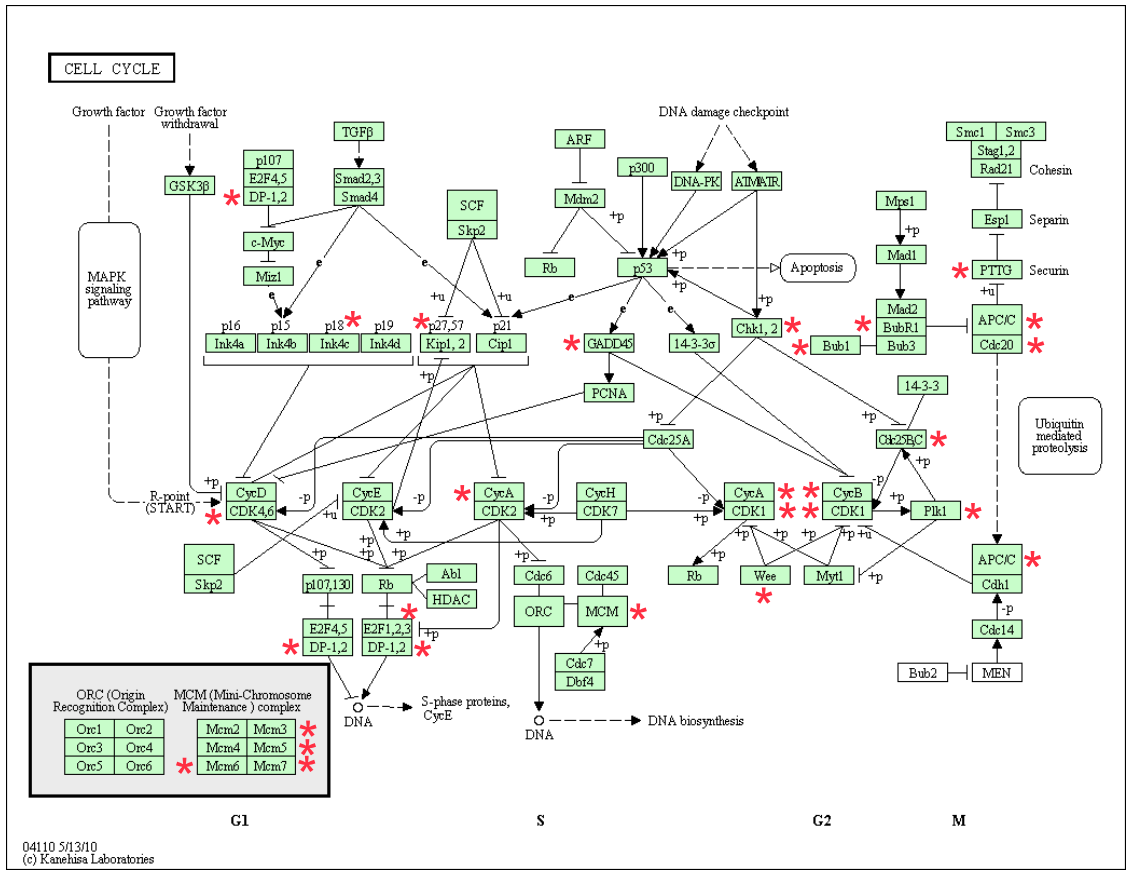

Supp Fig 2:

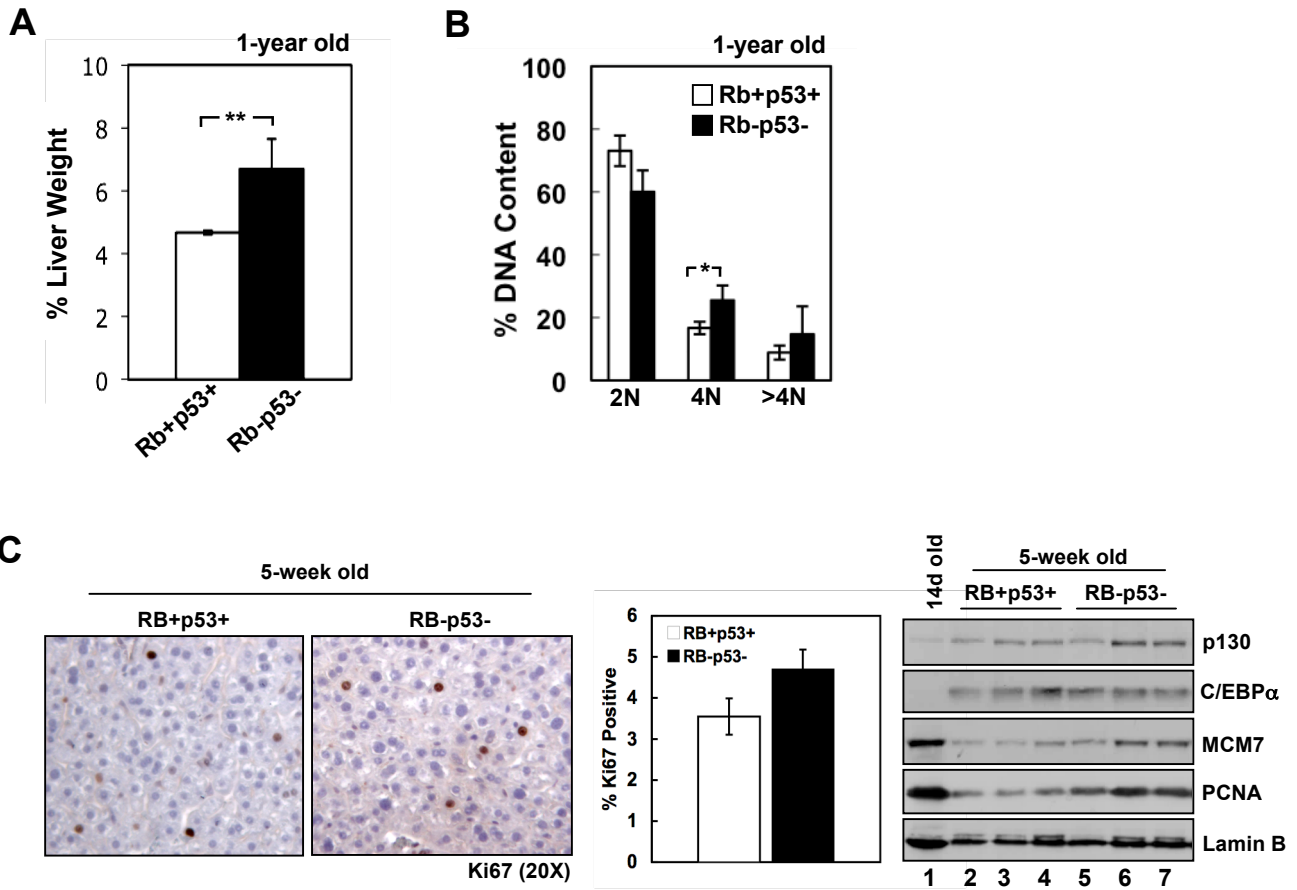

Supp Fig 3:

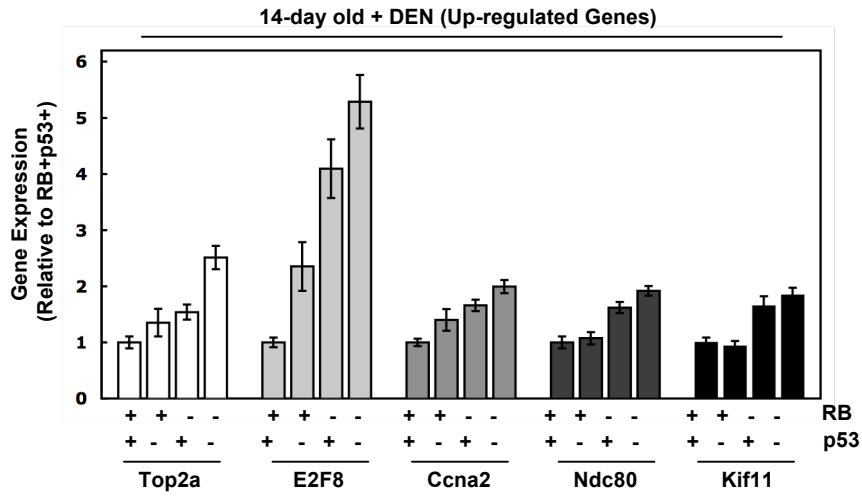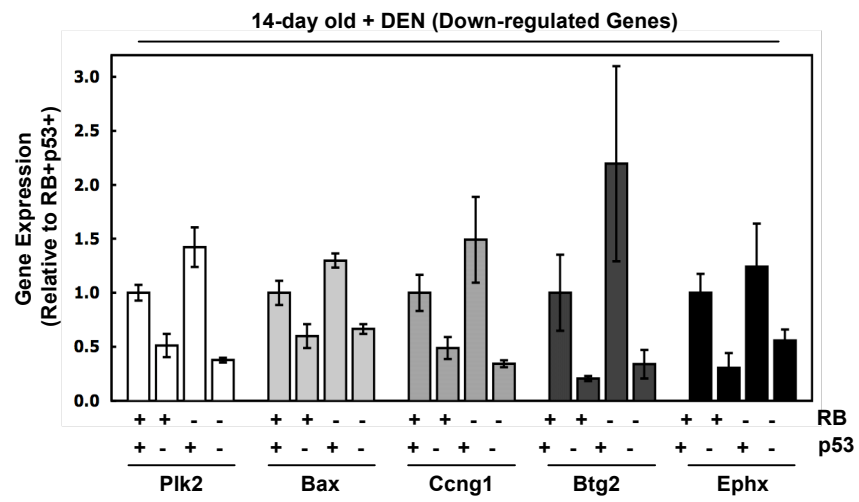

Supp Fig 4:

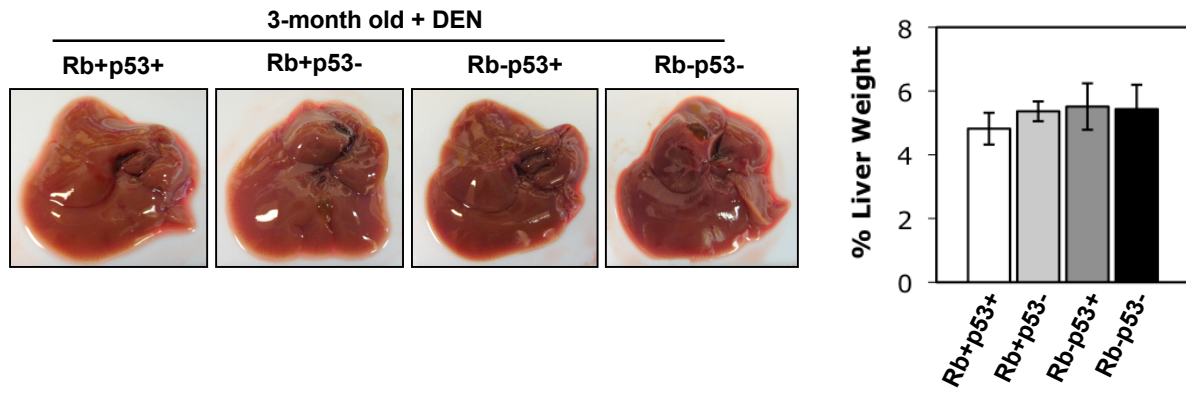

Supp Fig 5:

| TYPE | CHR | START     | END       | LENGHT   | P.VAL | FDR  | C1 | C2 | T1 | T2 | T3 | T4 | T5 |
|------|-----|-----------|-----------|----------|-------|------|----|----|----|----|----|----|----|
| GAIN | 6   | 21902136  | 21970612  | 68476    | 0.00  | 0.27 | 0  | 0  | 0  | 0  | 1  | 0  | 1  |
| LOSS | 7   | 7312489   | 9590761   | 2278272  | 0.00  | 0.13 | 0  | 0  | 1  | 1  | 1  | 1  | 1  |
| LOSS | 7   | 12241218  | 12261394  | 20176    | 0.00  | 0.23 | 0  | 0  | 1  | 1  | 1  | 0  | 1  |
| LOSS | 7   | 54628775  | 54668513  | 39738    | 0.00  | 0.23 | 0  | 0  | 1  | 1  | 1  | 1  | 0  |
| GAIN | 7   | 67533636  | 67877982  | 344346   | 0.00  | 0.17 | 0  | 0  | 0  | 1  | 1  | 1  | 1  |
| GAIN | 7   | 111427499 | 111483038 | 55539    | 0.00  | 0.17 | 0  | 0  | 0  | 0  | 1  | 1  | 1  |
| LOSS | 12  | 41729660  | 41746763  | 17103    | 0.00  | 0.26 | 0  | 0  | 1  | 0  | 1  | 1  | 0  |
| LOSS | 12  | 92677462  | 92715569  | 38107    | 0.00  | 0.26 | 0  | 0  | 1  | 0  | 1  | 0  | 1  |
| LOSS | 12  | 100466813 | 100471416 | 4603     | 0.00  | 0.26 | 0  | 0  | 1  | 0  | 1  | 1  | 0  |
| LOSS | 12  | 114805313 | 115166698 | 361385   | 0.00  | 0.26 | 0  | 0  | 1  | 0  | 1  | 0  | 1  |
| LOSS | 12  | 116568845 | 116678614 | 109769   | 0.00  | 0.26 | 0  | 0  | 1  | 0  | 1  | 1  | 0  |
| GAIN | 12  | 116719802 | 117218611 | 498809   | 0.00  | 0.26 | 0  | 0  | 0  | 0  | 0  | 1  | 0  |
| GAIN | 13  | 11871404  | 11884098  | 12694    | 0.00  | 0.30 | 0  | 0  | 0  | 1  | 0  | 0  | 1  |
| GAIN | 13  | 64470972  | 64497952  | 26980    | 0.00  | 0.30 | 0  | 0  | 0  | 0  | 1  | 0  | 1  |
| GAIN | 14  | 42078358  | 44394859  | 2316501  | 0.00  | 0.09 | 0  | 0  | 1  | 0  | 1  | 1  | 0  |
| GAIN | 14  | 54394962  | 54818532  | 423570   | 0.00  | 0.09 | 0  | 0  | 0  | 0  | 1  | 1  | 0  |
| LOSS | 17  | 23430651  | 23591812  | 161161   | 0.01  | 0.36 | 0  | 0  | 1  | 0  | 1  | 0  | 1  |
| LOSS | 17  | 30586287  | 31060146  | 473859   | 0.00  | 0.07 | 0  | 0  | 1  | 1  | 1  | 1  | 1  |
| GAIN | 17  | 36184673  | 36269858  | 85185    | 0.00  | 0.12 | 0  | 0  | 0  | 1  | 1  | 1  | 1  |
| GAIN | 17  | 80296183  | 80343792  | 47609    | 0.00  | 0.12 | 0  | 0  | 0  | 0  | 0  | 1  | 1  |
| GAIN | 17  | 92429208  | 92504811  | 75603    | 0.00  | 0.12 | 0  | 0  | 0  | 1  | 0  | 1  | 0  |
| GAIN | 19  | 6050357   | 6068723   | 18366    | 0.00  | 0.18 | 0  | 0  | 1  | 0  | 0  | 0  | 1  |
| GAIN | 19  | 6236664   | 6376742   | 140078   | 0.00  | 0.18 | 0  | 0  | 1  | 0  | 0  | 0  | 1  |
| GAIN | 19  | 6984586   | 7068801   | 84215    | 0.00  | 0.18 | 0  | 0  | 1  | 0  | 0  | 0  | 1  |
| GAIN | 19  | 22038330  | 22090628  | 52298    | 0.00  | 0.18 | 0  | 0  | 0  | 1  | 0  | 1  | 0  |
| LOSS | X   | 7788452   | 52584486  | 44796034 | 0.01  | 0.01 | 0  | 0  | 0  | 1  | 0  | 1  | 0  |
| LOSS | X   | 77836390  | 96330106  | 18493716 | 0.01  | 0.01 | 0  | 0  | 0  | 1  | 0  | 1  | 0  |
| LOSS | X   | 121411744 | 136999010 | 15587266 | 0.01  | 0.01 | 0  | 0  | 0  | 1  | 0  | 0  | 0  |
| LOSS | X   | 137188371 | 144192826 | 7004455  | 0.01  | 0.01 | 0  | 0  | 0  | 1  | 1  | 1  | 0  |
| LOSS | X   | 146438476 | 166395816 | 19957340 | 0.01  | 0.01 | 0  | 0  | 0  | 1  | 0  | 1  | 0  |
